# Supplementary material for: High-density amino groups on polyacrylonitrile nanofibers via chemical grafting for selective Co(II) adsorption
Source: Research Square preprint supplement (doi:10.21203/rs.3.rs-8076703/v1), 2025-12-05
Supplement: Supplementary file 1 [file 571c0cffcc0afdd3c9461502.docx]

Supporting information for

**High-density amino groups on polyacrylonitrile nanofibers via chemical grafting for selective Co(II) adsorption**

Yang Luo, Shuyuan Liu, Weiwei Li, Guangchuan He, Guangfu Chen, Xianchen Huang, Xiangyang Niu, Jiahui Ruan, Linlin Huang, Guoyuan Yuan *

College of Chemistry and Chemical Engineering, Chongqing University of Science and Technology, Chongqing 401331, PR China.

***** **Corresponding Autho**r:

Guoyuan Yuan: [guoyuan@cqust.edu.cn](mailto:guoyuan@cqust.edu.cn)

**Section 1** Materials

**Section 1** Characterization of Materials

**Section 2** The equilibrium adsorption capacity

**Section 3** Adsorption kinetics

**Section 4** Adsorption isotherms

**Section 5** Sorption thermodynamic

**Section 1 Materials**

The following chemicals were purchased from Chengdu Kelong Chemical Co., Ltd. (Chengdu, China) and used as received without further purification: polyacrylonitrile (PAN), triethylenetetramine (TETA), N,N-dimethylformamide (DMF), sodium hydroxide (NaOH), nitric acid (HNO₃), and taurine (C₂H₇NO₃S), among others.

**Section 2 Characterization of Materials**

A Fourier transform infrared (FTIR) spectrometer (NICOLET iS10, Thermo Fisher Scientific, USA) was employed for the qualitative characterization of the surface functional groups of the materials, with the aim of clarifying the types and variations of surface groups on the modified materials.

A porosity analyzer (TriStar II Plus 3030, Micromeritics Instrument Corporation, USA) was used to determine the specific surface area, porosity, and pore size distribution of the materials, so as to investigate the effect of the materials’ pore structures on their adsorption performance.

Analysis of the materials' surface morphology, microstructure, and elemental composition was carried out using a scanning electron microscope-energy dispersive spectrometer (SEM-EDS, Model JSM-7800F, JEOL Ltd, Japan). This analysis helped verify the introduction of elements during the modification process as well as their distribution characteristics.

The surface contact angle of the materials was measured using a surface analysis system (Model SDC-200S, SINDIN, China). This measurement facilitated analysis of the materials' surface hydrophilic/hydrophobic properties and evaluation of the actual impact of contact efficiency between the materials and aqueous solutions on the adsorption process.

An X-ray photoelectron spectrometer (XPS, Escalab 250Xi, Thermo Fisher Scientific, USA) was used to analyze changes in the binding energies of elements (e.g., nitrogen and cobalt) in the materials before and after Co(II) adsorption. This analysis sought to elucidate the coordination mechanism between amino groups and Co(II), clarify the evolution of the chemical states of elements during the adsorption process, and provide direct evidence regarding the chemical states for inferring the adsorption mechanism.

**Section 2** **The equilibrium adsorption capacity**

The amount of Co(II) adsorbed per unit mass of the adsorbent, defined as the equilibrium adsorption capacity (*qₑ*) was calculated by Eq. (S1).

(S1)

Where *C0* and *Ce* represent the initial concentration and equilibrium concentration of Co(II) (mg/L), respectively; *V* is the volume of the solution (L); and *m* is the mass of the adsorbent (g).

**Section 3 Adsorption kinetics**

Adsorption is a dynamic process and many kinetic equations describing the rate of the adsorption reaction have been developed to explore the rate and mechanism of adsorption. The use of adsorption kinetic equations enables the determination of parameters that not only serve as indicators of the adsorption rate but also shed light on the underlying mechanism governing the adsorption process. The main kinetic models based on solid adsorption rates commonly used are pseudo-first-order (Eq. S2) and pseudo-second-order (Eq. S3) kinetic models, which can be described as follows:

(S2)

(S3)

Where *qe* and *qt* are the equilibrium adsorption capacity and instantaneous adsorption capacity (mg/g), respectively; *k1* and *k2* are the pseudo-first-order adsorption rate constant and pseudo-second-order adsorption rate constant (h⁻¹), respectively.

**Section 4 Adsorption isotherms**

The adsorption isothermal curve is the curve of the relationship between the concentrations of solute molecules in the two phases when they reach equilibrium in the adsorption process at the interface of the two phases at a specific temperature. To study the adsorption mechanism and evaluate the saturated adsorption capacity of PAN-NFs-TETA, the Langmuir model (Eq. S4) and Freundlich model (Eq. S5) can be described as follows:

(S4)

(S5)

Where *qm* and *qe* represent the theoretical maximum adsorption capacity and equilibrium adsorption capacity of Co(II) (mg/g), respectively; *Ce* is the equilibrium concentration of Co(II) (mg/L); *KF* and *KL* are the Freundlich equilibrium adsorption constant and Langmuir equilibrium adsorption constant (L/mg), respectively; *n* is the Freundlich constant (related to adsorption intensity).

**Section 5** **Sorption thermodynamic**

The thermodynamic parameters changes including standard enthalpy Δ*H*θ, standard entropy Δ*S*θ and Gibbs free energy Δ*G*θ were calculated in accordance with Eq. S6 and Eq. S67:

(S6)

(S7)

In the thermodynamic calculations, *R* (8.314 J/mol·K) represents the universal gas constant, *T* (K) is the absolute temperature of the solution, and *K*d is the equilibrium constant of the adsorption process.
